# Supplementary material for: Understanding the Mechanism of Action of NAI-112, a Lanthipeptide with Potent Antinociceptive Activity
Source: MDPI journal article supplement (doi:10.3390/molecules26226764), 2021-11-09
Supplement: s1 [file s1]

# Understanding the mechanism of action of NAI-112, a lanthipeptide with potent antinociceptive activity

Arianna Tocchetti<sup>1</sup>, Marianna Iorio<sup>1,\*</sup>, Zeeshan Hamid<sup>2</sup>, Andrea Armirotti<sup>3</sup>, Angelo Reggiani<sup>3</sup> and Stefano Donadio<sup>1</sup>

<sup>1</sup> Naicons Srl, Viale Ortles 22/4, 20139 Milan, Italy

<sup>2</sup> D3 Validation, Fondazione Istituto Italiano di tecnologia, via Morego 30, 16163 Genoa, Italy

<sup>3</sup> Analytical Chemistry Lab, Fondazione Istituto Italiano di tecnologia, via Morego 30, 16163 Genoa, Italy

\* Correspondence: miorio@naicons.com

## Supplementary results

1. Figure S1;
2. Figure S2;
3. Figure S3;
4. Table S1.

### 1. Figure S1.

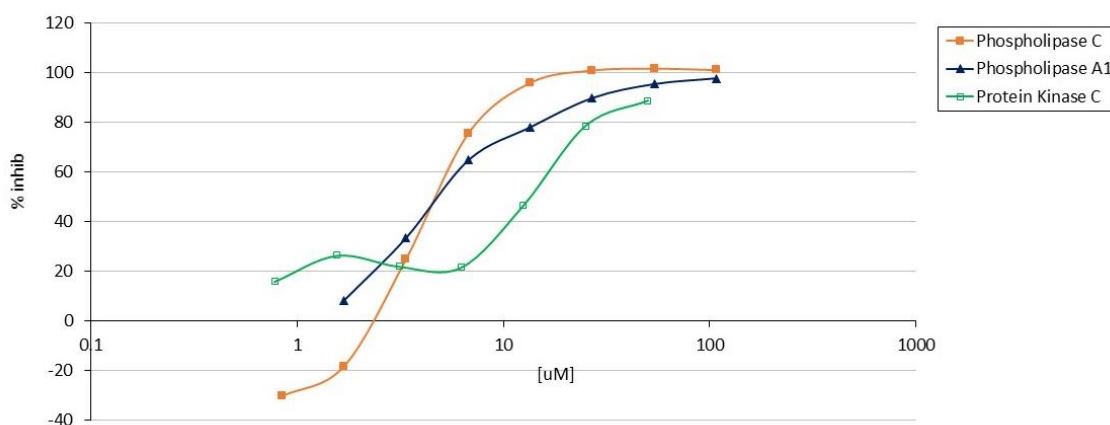

**Figure S1.** Inhibition by NAI-112 of Protein Kinase C and Phospholipases A1 and C.

2. Figure S2.

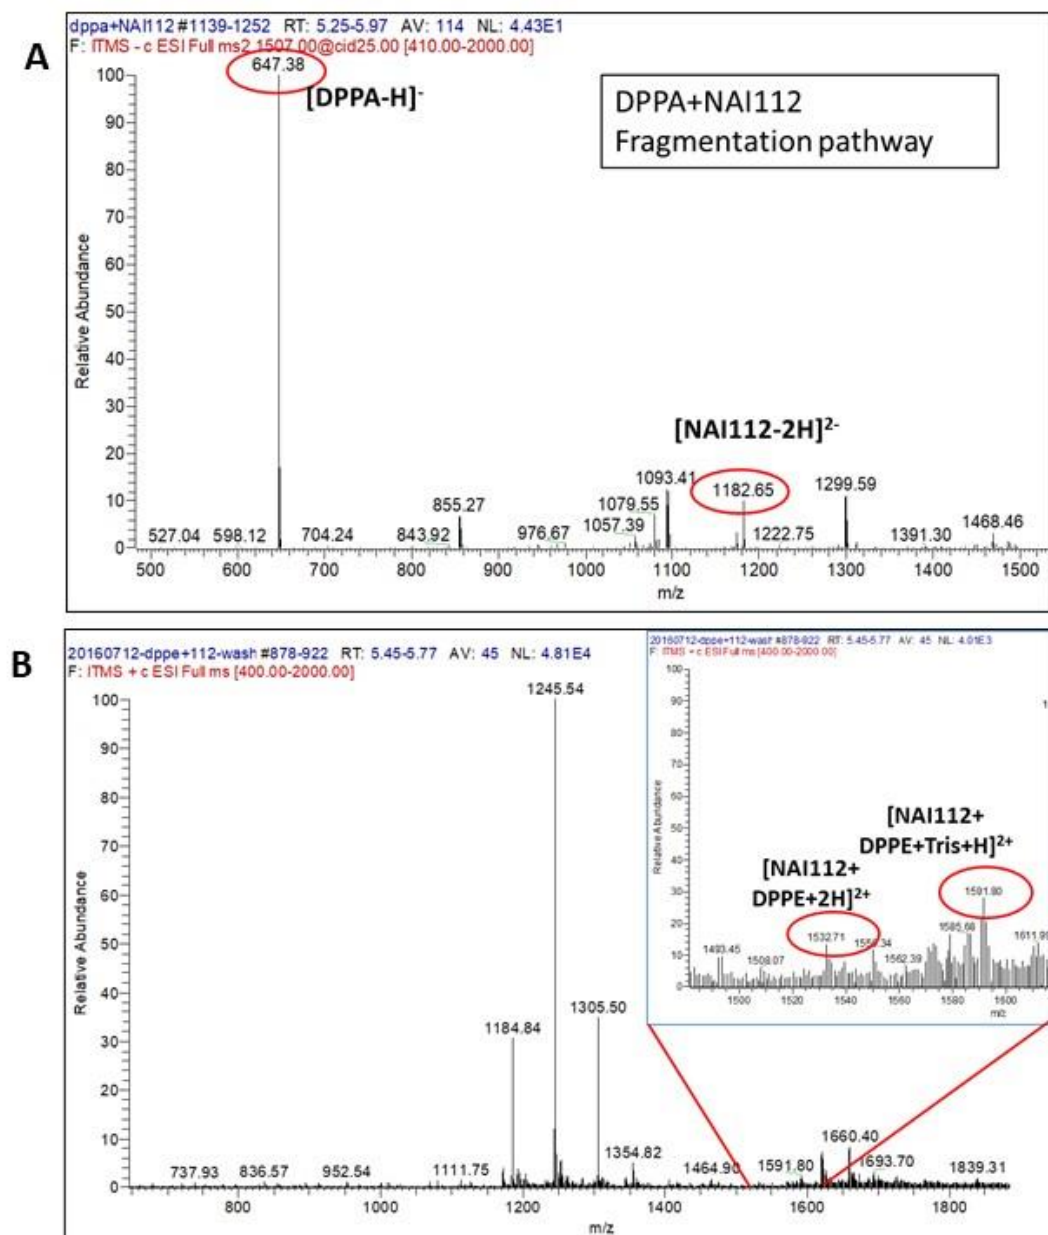

3. Figure S3.

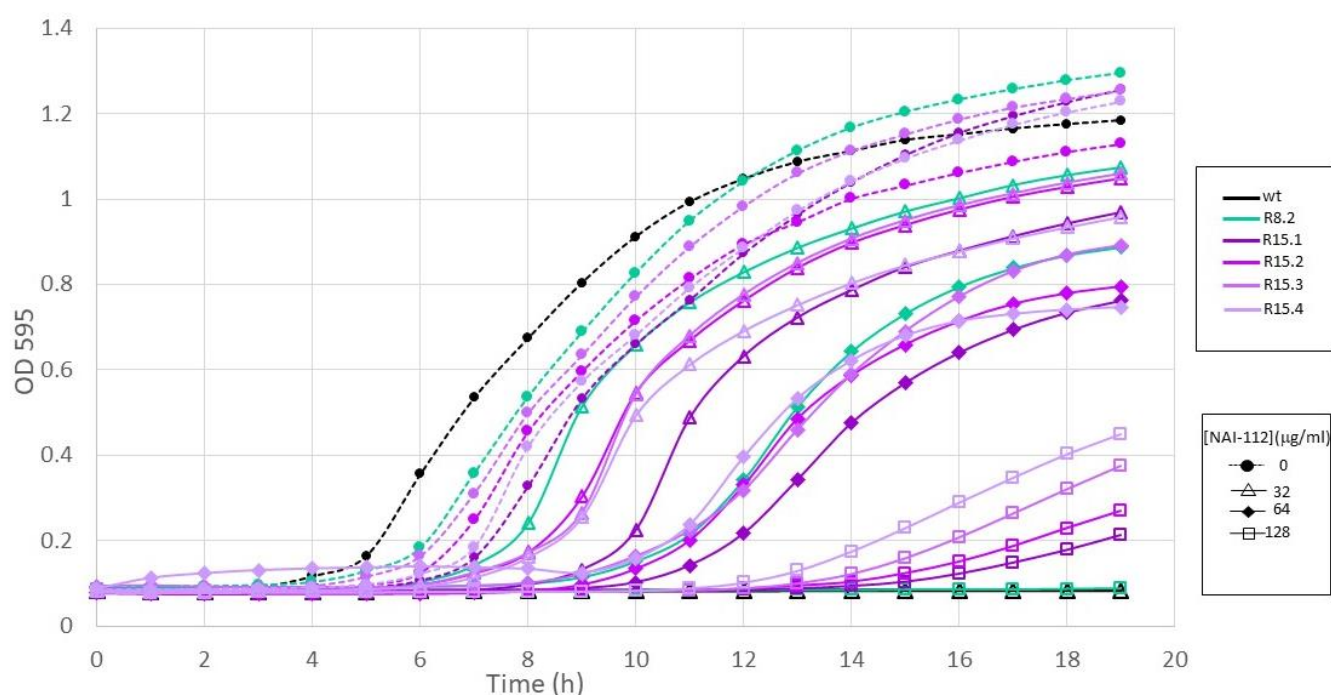**Figure S3.** Growth of *S. aureus* ATCC6538P (wt), and of the R8.2 and R15.1-4 mutant strains in the presence of NAI-112.

4. Table S1.

**Table S1.** Mutations observed in only one mutant strain resistant to NAI-112.

| Mutant strain | Genome position (nt) <sup>a</sup> | CDS (locus) <sup>a</sup> | Type of mutation | Nucleotide change         | Aminoacid change   | Function                                                   |
|---------------|-----------------------------------|--------------------------|------------------|---------------------------|--------------------|------------------------------------------------------------|
| R8.1          | 1650902                           | SAFDA_1522               | DEL              | CATCTCTCACTG <sup>b</sup> | del 108-111 (RDAV) | hypothetical protein                                       |
|               | 1859248                           | SAFDA_1703 to SAFDA_1704 | DEL              | -A                        | non-coding         | serine protease SplA – hypothetical protein                |
| R15.3         | 731151                            | SAFDA_0655 to SAFDA_0656 | SNP              | G to A                    | non-coding         | hypothetical protein – queuosine biosynthesis protein QueE |
|               | 1907656                           |                          | SNP              | G to A                    |                    |                                                            |
|               | 1907657                           | SAFDA_t0034              | SNP              | C to G                    |                    | tRNA-Ser                                                   |
|               | 1907666                           |                          | SNP              | G to C                    |                    |                                                            |
|               | 2528678                           | SAFDA_2348               | SNP              | C to T <sup>b</sup>       | Arg410His          | surface protein G1                                         |
|               | 2612200                           | SAFDA_2421               | SNP              | T to C <sup>b</sup>       | Glu503Gly          | acyltransferase                                            |

|       |         |                          |     |                     |            |                                                     |
|-------|---------|--------------------------|-----|---------------------|------------|-----------------------------------------------------|
| R15.4 | 261100  | SAFDA_0212               | SNP | G to T <sup>b</sup> | non-coding | cell wall biosynthesis protein                      |
|       | 261127  | to SAFDA_0213            | SNP | G to A <sup>b</sup> |            | ScdA – LytS (two-component sensor histidine kinase) |
|       | 984361  | SAFDA_0899               | SNP | A to G <sup>b</sup> | Lys45Glu   | hypothetical protein                                |
|       | 1923796 | SAFDA_1757               | SNP | G to A <sup>b</sup> | Gly10Glu   | hypothetical protein                                |
|       | 2535962 | SAFDA_2353               | SNP | G to T <sup>b</sup> | Thr26Asn   | hypothetical protein                                |
| R15.5 | 2287402 | SAFDA_2121 to SAFDA_2122 | SNP | T to C <sup>b</sup> | non-coding | between truncated transposases                      |
| R15.3 | 512392  | SAFDA_0459               | SNP | C to A              | non-coding | lysyl-tRNA                                          |
|       | 512395  | to                       | SNP | A to T              |            | synthetase – 5S                                     |
|       | 512388  | SAFDA_r0004              | SNP | C to A              |            | ribosomal RNA                                       |
| R15.3 | 523914  | SAFDA_r0010              | SNP | A to G <sup>b</sup> | non-coding | 5S ribosomal RNA – GntR family                      |
| R15.4 | 523941  | to SAFDA_0460            | DEL | -G <sup>b</sup>     |            | transcriptional regulator                           |

<sup>a</sup> numbering and annotations are from reference genome (accession number AP014942.1).

<sup>b</sup> mutation results in sequence identical to that of reference genome.
